# Supplementary material for: Aggregation-induced emission in novel multilayered 3D polymers: development of a fluorescent probe for selective metal ion detection
Source: Royal Society of Chemistry journal article supplement (doi:10.1039/d4ra08548e), 2025-01-01
Supplement: d4ra08548e1.pdf [file d4ra08548e1.pdf]

## Supporting Information

# Aggregation-Induced Emission in Novel Multilayered 3D Polymers: Development of a Fluorescent Probe for Selective Metal Ion Detection

Sai Zhang,<sup>1\*</sup> Qingkai Yuan,<sup>2</sup> Qingzheng Xu,<sup>3</sup> Shenghu Yan,<sup>1</sup> Yue Zhang,<sup>1\*</sup> Guigen Li <sup>2\*</sup>

<sup>1</sup> School of Pharmacy, Continuous Flow Engineering Laboratory of National Petroleum and Chemical Industry, Changzhou University, Changzhou, Jiangsu 213164, China

<sup>2</sup> Department of Chemistry, Texas Tech University, Lubbock, TX 79415, USA

<sup>3</sup> School of Chemistry and Chemical Engineering, Nanjing University, Nanjing, Jiangsu 210008, China

\*Corresponding Author

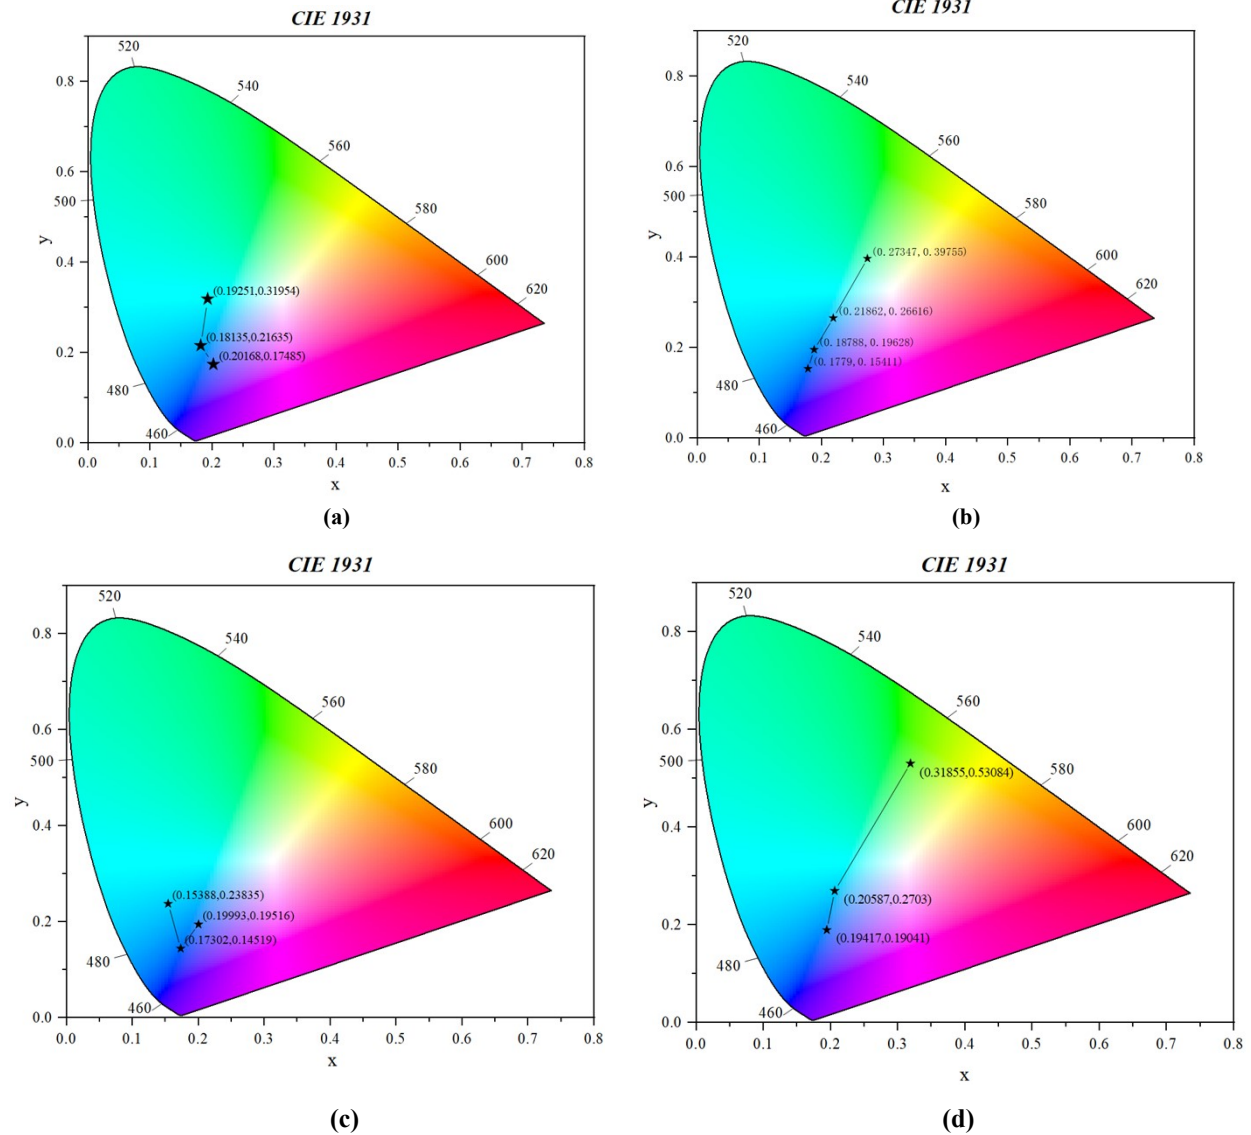

Figure S1 (a) Chroma transfer reflected by CIE 1931 coordinates in the excitation of different wavelengths based on Figure 3(a).

(b) Chroma transfer reflected by CIE 1931 coordinates in the excitation of different wavelengths based on Figure 3(b)

(c) Chroma transfer reflected by CIE 1931 coordinates in the excitation of different wavelengths based on Figure 3(c)

(d) Chroma transfer reflected by CIE 1931 coordinates in the excitation of different wavelengths based on Figure 3(d)

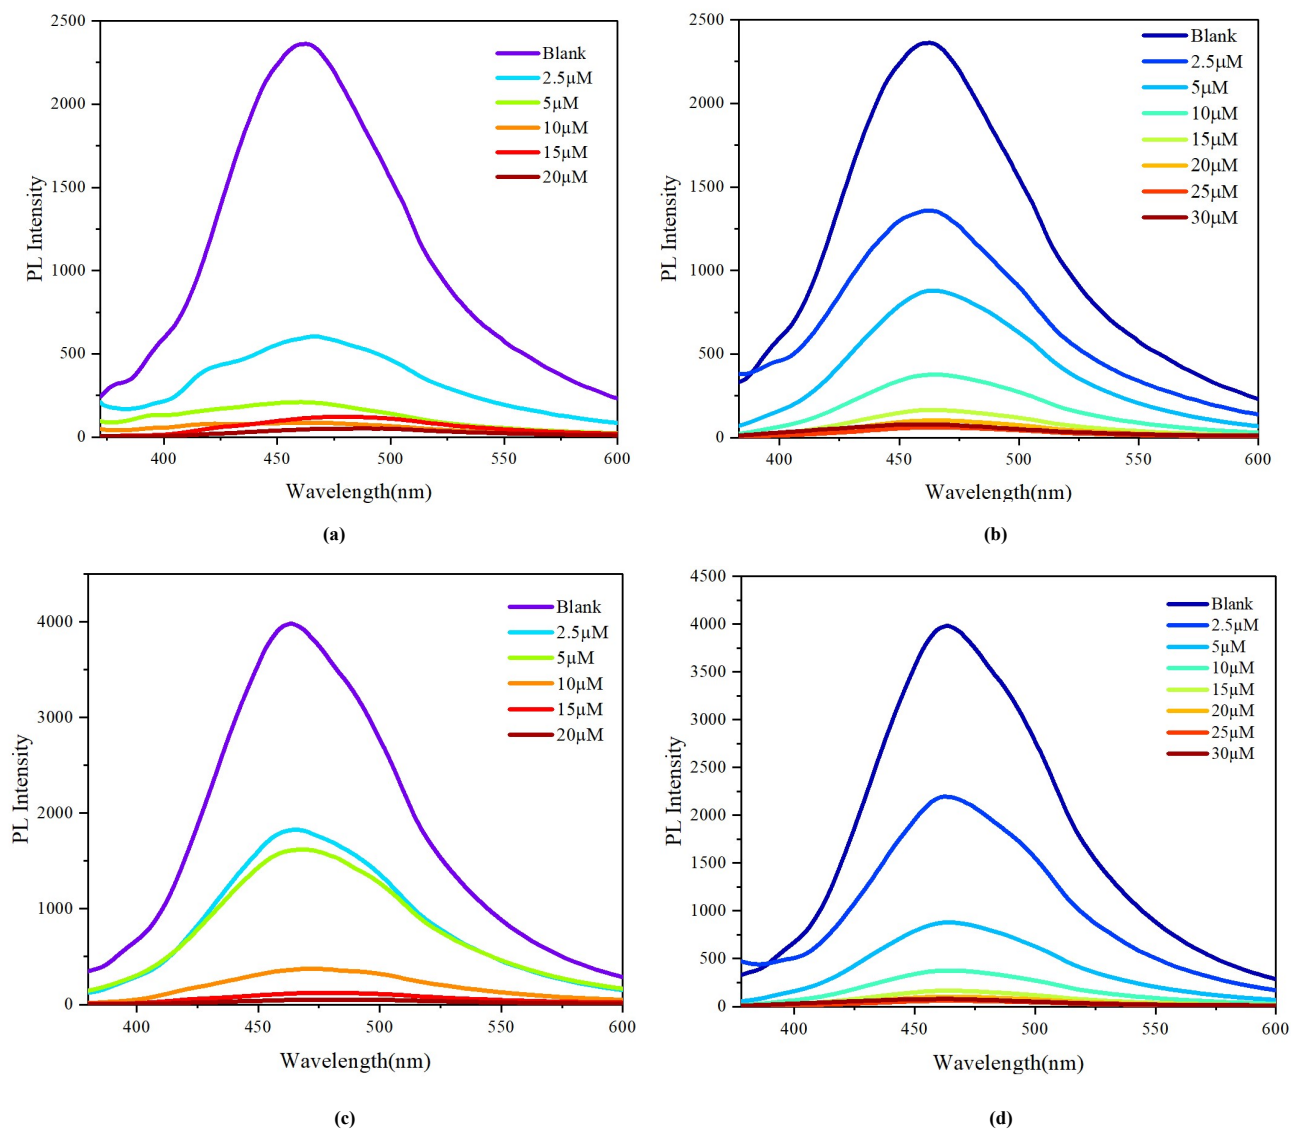

Figure S2. (a)(b) Concentration-dependent fluorescence spectra of polymer 1 (0.05mg/mL) on the addition of various amounts of  $\text{Cr}^{6+}$  (0–20  $\mu\text{M}$ ) and  $\text{Fe}^{3+}$  (0–30 $\mu\text{M}$ ) in PBS buffer (20 mM pH=7.4) solution (THF). The excitation wavelength was 331 nm.

(c)(d) Concentration-dependent fluorescence spectra of polymer 2 (0.05mg/mL) on the addition of various amounts of  $\text{Cr}^{6+}$  (0–20  $\mu\text{M}$ ) and  $\text{Fe}^{3+}$  (0–30 $\mu\text{M}$ ) in PBS buffer (20 mM pH=7.4) solution (THF). The excitation wavelength was 331 nm.
